# Supplementary material for: Contact‐Free Screening of Atrial Fibrillation by a Smartphone Using Facial Pulsatile Photoplethysmographic Signals
Source: PubMed Central journal article supplement — J Am Heart Assoc. 2018 Apr 5;7(8):e008585. doi: 10.1161/JAHA.118.008585 (PMC6015414; doi:10.1161/jaha.118.008585), 2018-04-05
Supplement: JAH3-7-e008585-s001.pdf [file JAH3-7-e008585-s001.pdf]

# **Supplemental Material**

**Figure S1. The von Luschan skin color chart.**

|  |          |           |  |  |           |           |  |
|--|----------|-----------|--|--|-----------|-----------|--|
|  | <b>1</b> | <b>10</b> |  |  | <b>19</b> | <b>28</b> |  |
|  | <b>2</b> | <b>11</b> |  |  | <b>20</b> | <b>29</b> |  |
|  | <b>3</b> | <b>12</b> |  |  | <b>21</b> | <b>30</b> |  |
|  | <b>4</b> | <b>13</b> |  |  | <b>22</b> | <b>31</b> |  |
|  | <b>5</b> | <b>14</b> |  |  | <b>23</b> | <b>32</b> |  |
|  | <b>6</b> | <b>15</b> |  |  | <b>24</b> | <b>33</b> |  |
|  | <b>7</b> | <b>16</b> |  |  | <b>25</b> | <b>34</b> |  |
|  | <b>8</b> | <b>17</b> |  |  | <b>26</b> | <b>35</b> |  |
|  | <b>9</b> | <b>18</b> |  |  | <b>27</b> | <b>36</b> |  |

Reprinted from Treesirichod et al.<sup>1</sup> with permission. Copyright ©2014, Wolters Kluwer

Medknow Publications.

**Supplemental Reference:**

1. Treesirichod A, Chansakulporn S, Wattanapan P. Correlation between skin color evaluation by skin color scale chart and narrowband reflectance spectrophotometer. *Indian J Dermatol.* 2014;59:339-42.
